# Supplementary material for: Group-I lead oxide X 2 PbO 3 (X = Li, Na, K, Rb, and Cs) glass-like materials for energy applications: a hybrid-DFT study
Source: Royal Society of Chemistry journal article supplement (doi:10.1039/d5ra07886e), 2025-01-01
Supplement: d5ra07886e1.pdf [file d5ra07886e1.pdf]

## Supplementary data

### Group-I lead oxide $X_2\text{PbO}_3$ ( $X=\text{Li, Na, K, Rb, and Cs}$ ) glass-like materials for energy applications: A hybrid-DFT study

R. Zosiamliana,<sup>a,b</sup> Lalhriat Zuala,<sup>b</sup> Lalrinthara Pachuau,<sup>b</sup> Lalmuanpuia Vanchhawng,<sup>b</sup> S. Gurung,<sup>b</sup>  
A. Laref,<sup>c</sup> Shalik R. Bhandari,<sup>d</sup> and D. P. Rai<sup>a,\*</sup>

<sup>a</sup> Department of Physics, Mizoram University, Aizawl-796004, India.

<sup>b</sup> Physical Sciences Research Center (PSRC), Department of Physics, Pachhunga University College, Aizawl-796001, India.

<sup>c</sup> Department of Physics and Astronomy, College of Science, King Saud University, Riyadh, 11451, Saudi Arabia.

<sup>d</sup> Department of Physics, Bhairahawa Multiple Campus, Tribhuvan University, Siddharthanagar-32900, Rupandehi, Nepal.

\***Email:** *dibyaprakashrai@gmail.com*

Table S1: Calculated structural parameters and formation energy ( $E^f$ ) for  $X_2PbO_3$  ( $X=Li, Na, K, Rb, Cs$ ) compounds. Here,  $|\Delta a|$ ,  $|\Delta b|$ , and  $|\Delta c|$  represent the relative error percentages of lattice parameters with respect to the experimental data. Also, \* is the suited functional in reproducing the experimental lattice parameters more accurately.

| Symmetry<br>(Space<br>group) | Employed<br>Methodology | a (Å) | b (Å) | c (Å) | $\alpha$ | $\beta$ | $\gamma$ | $ a $<br>(%) | $ b $<br>(%) | $ c $<br>(%) | $E^f$ (Ha) |
|------------------------------|-------------------------|-------|-------|-------|----------|---------|----------|--------------|--------------|--------------|------------|
| X=Li                         |                         |       |       |       |          |         |          |              |              |              |            |
| C2/c                         | PBE-GGA                 | 5.50  | 9.49  | 5.57  | 90.00°   | 110.44° | 90.00°   | 0.92         | 2.48         | 1.64         | -0.126     |
|                              | B3LYP                   | 5.52  | 9.39  | 5.58  | 90.00°   | 111.42° | 90.00°   | 0.73         | 1.40         | 1.82         | -0.159     |
|                              | HSE06                   | 5.43  | 9.31  | 5.49  | 90.00°   | 110.70° | 90.00°   | 0.37         | 0.54         | 0.18         | -0.159     |
|                              | PBE0*                   | 5.42  | 9.30  | 5.48  | 90.00°   | 110.68° | 90.00°   | 0.55         | 0.43         | 0.00         | -0.166     |
|                              | Exp. [1]                | 5.45  | 9.26  | 5.48  | 90.00°   | 111.22° | 90.00°   | ---          | ---          | ---          | ---        |
| X=Na                         |                         |       |       |       |          |         |          |              |              |              |            |
| C2/c                         | PBE-GGA                 | 6.01  | 10.03 | 5.79  | 90.00°   | 111.42° | 90.00°   |              |              |              | -0.123     |
|                              | B3LYP                   | 5.98  | 9.94  | 5.75  | 90.00°   | 111.57° | 90.00°   |              |              |              | -0.154     |
|                              | HSE06                   | 5.93  | 9.85  | 5.68  | 90.00°   | 111.45° | 90.00°   |              |              |              | -0.155     |
|                              | PBE0                    | 5.92  | 9.83  | 5.67  | 90.00°   | 111.46° | 90.00°   |              |              |              | -0.162     |
|                              | Exp.                    | ---   | ---   | ---   | ---      | ---     | ---      | ---          | ---          | ---          | ---        |
| X=K                          |                         |       |       |       |          |         |          |              |              |              |            |
| $Cmc2_1$                     | PBE-GGA                 | 10.93 | 7.09  | 6.13  | 90.00°   | 90.00°  | 90.00°   | 2.73         | 0.00         | 2.51         | -0.140     |
|                              | B3LYP                   | 10.88 | 7.06  | 6.10  | 90.00°   | 90.00°  | 90.00°   | 2.26         | 0.42         | 2.01         | -0.170     |
|                              | HSE06                   | 10.78 | 7.03  | 6.03  | 90.00°   | 90.00°  | 90.00°   | 1.32         | 0.85         | 0.84         | -0.173     |
|                              | PBE0*                   | 10.77 | 7.03  | 6.02  | 90.00°   | 90.00°  | 90.00°   | 1.22         | 0.85         | 0.67         | -0.179     |
|                              | Exp. [2]                | 10.64 | 7.09  | 5.98  | 90.00°   | 90.00°  | 90.00°   | ---          | ---          | ---          | ---        |
| X=Rb                         |                         |       |       |       |          |         |          |              |              |              |            |
| $Cmc2_1$                     | PBE-GGA                 | 11.16 | 7.51  | 6.16  | 90.00°   | 90.00°  | 90.00°   | 2.95         | 0.27         | 2.50         | -0.166     |
|                              | B3LYP                   | 11.12 | 7.49  | 6.13  | 90.00°   | 90.00°  | 90.00°   | 2.58         | 0.00         | 1.99         | -0.197     |
|                              | HSE06                   | 10.99 | 7.44  | 6.04  | 90.00°   | 90.00°  | 90.00°   | 1.38         | 0.67         | 0.50         | -0.202     |
|                              | PBE0*                   | 10.97 | 7.44  | 6.03  | 90.00°   | 90.00°  | 90.00°   | 1.20         | 0.67         | 0.33         | -0.210     |
|                              | Exp. [3]                | 10.84 | 7.49  | 6.01  | 90.00°   | 90.00°  | 90.00°   | ---          | ---          | ---          | ---        |
| X=Cs                         |                         |       |       |       |          |         |          |              |              |              |            |
| $Cmc2_1$                     | PBE-GGA                 | 11.62 | 7.96  | 6.22  | 90.00°   | 90.00°  | 90.00°   | 2.65         | 1.53         | 2.81         | -0.172     |
|                              | B3LYP                   | 11.64 | 8.01  | 6.20  | 90.00°   | 90.00°  | 90.00°   | 2.83         | 2.17         | 2.48         | -0.204     |
|                              | HSE06                   | 11.47 | 7.89  | 6.11  | 90.00°   | 90.00°  | 90.00°   | 1.33         | 0.64         | 0.99         | -0.207     |

|  |          |       |      |      |        |        |        |      |      |      |        |
|--|----------|-------|------|------|--------|--------|--------|------|------|------|--------|
|  | PBE0*    | 11.46 | 7.89 | 6.09 | 90.00° | 90.00° | 90.00° | 1.24 | 0.64 | 0.66 | -0.215 |
|  | Exp. [5] | 11.32 | 7.84 | 6.05 | 90.00° | 90.00° | 90.00° | ---  | ---  | ---  | ---    |

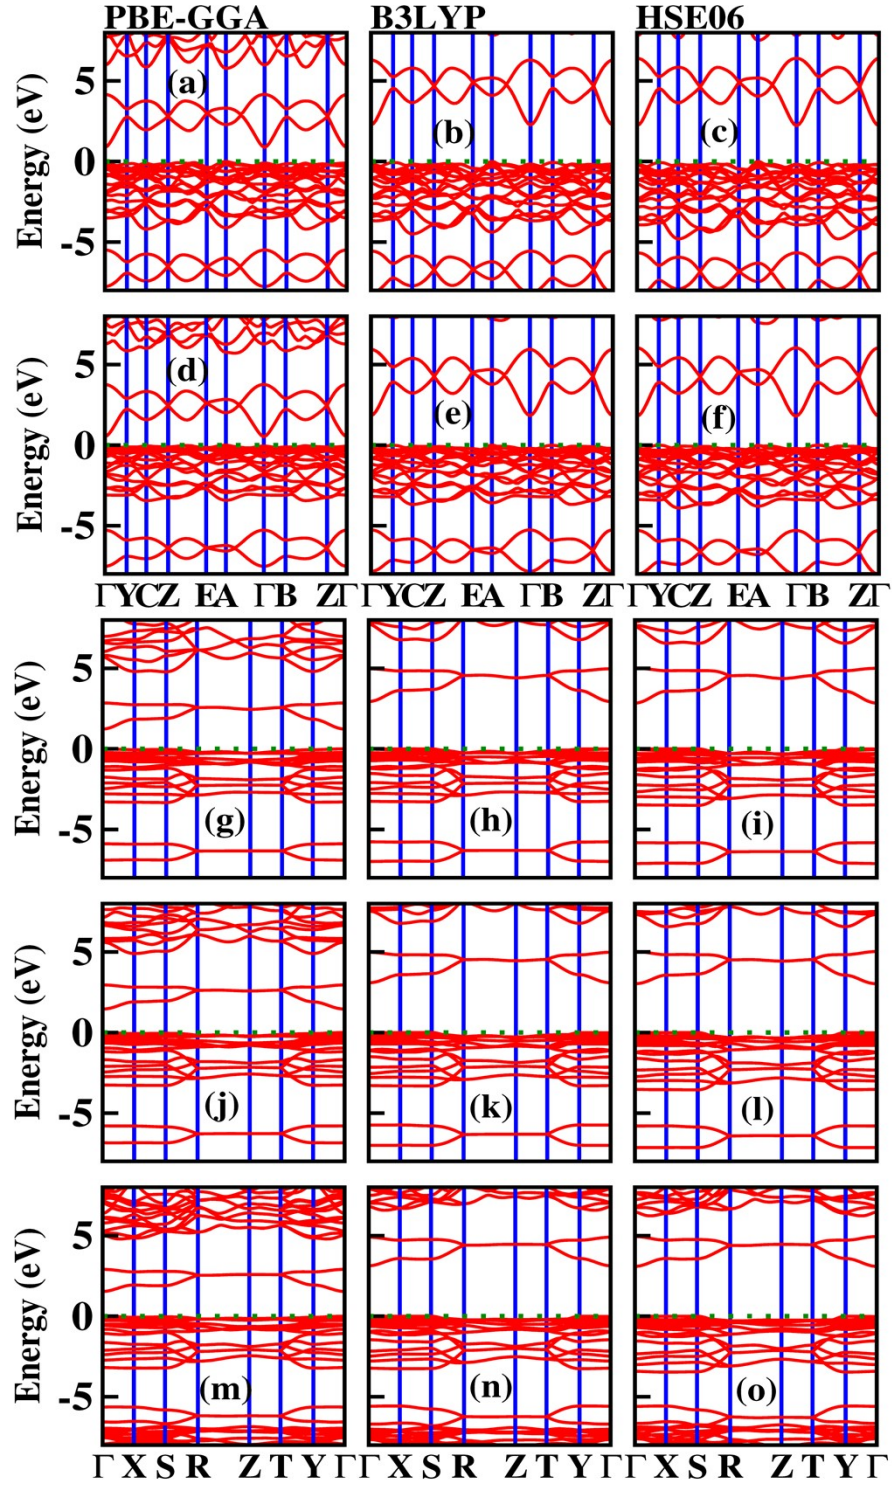

FIG. S1: Calculated band structures for  $X_2PbO_3$  using PBE-GGA, B3LYP, and HSE06 and PBE0 functionals: (a-c)  $X=Li$ , (d-f)  $X=Na$ , (g-i)  $X=K$ , (j-l)  $X=Rb$ , and (m-o)  $X=Cs$ .

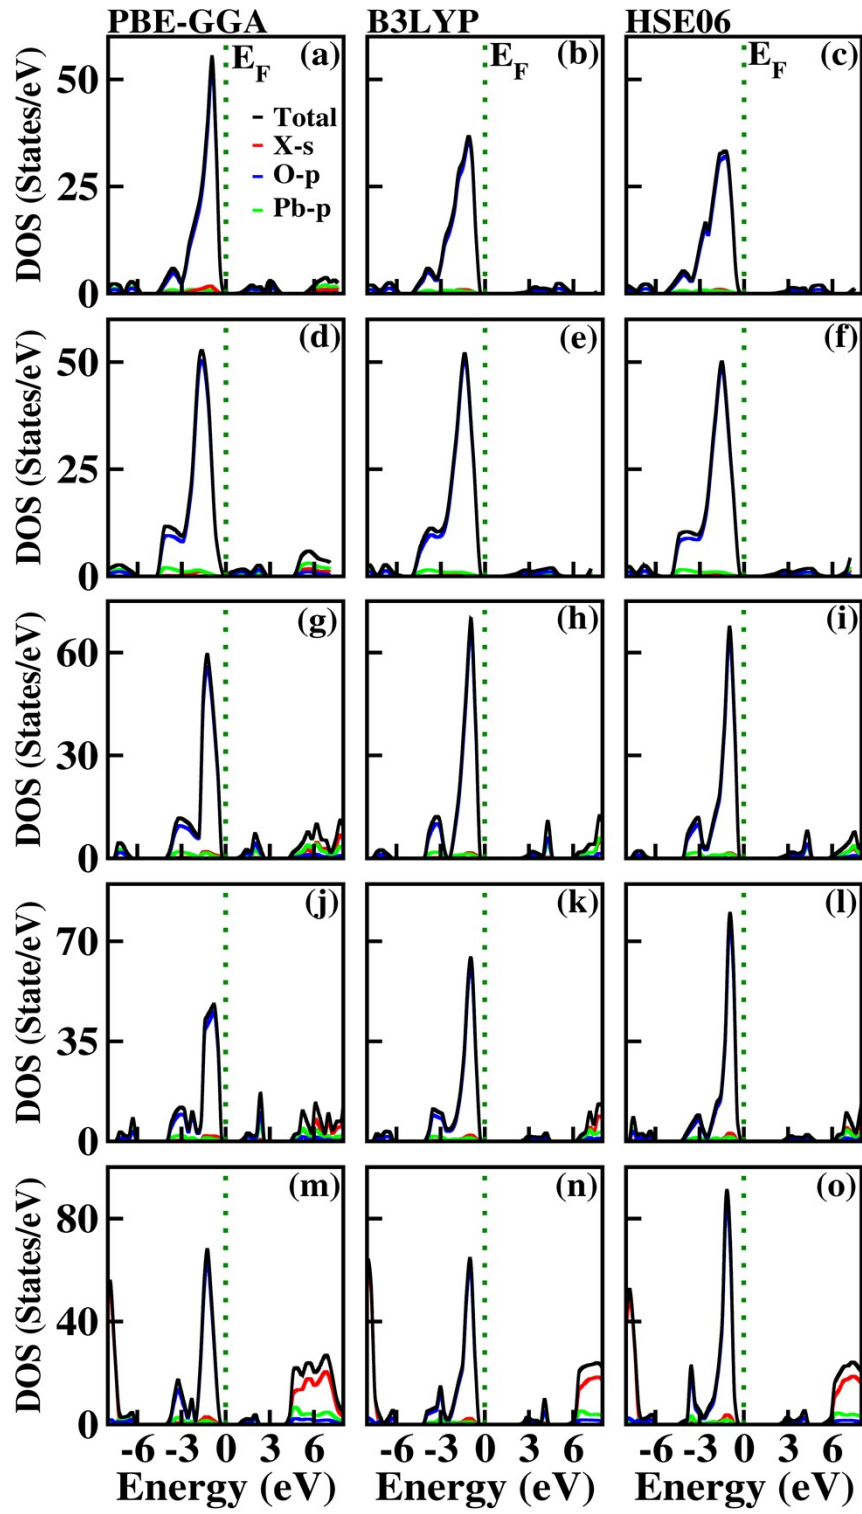

FIG. S2: Calculated DOS for  $X_2\text{PbO}_3$  using PBE-GGA, B3LYP, and HSE06 and PBE0 functionals: (a-c)  $X=\text{Li}$ , (d-f)  $X=\text{Na}$ , (g-i)  $X=\text{K}$ , (j-l)  $X=\text{Rb}$ , and (m-o)  $X=\text{Cs}$ .

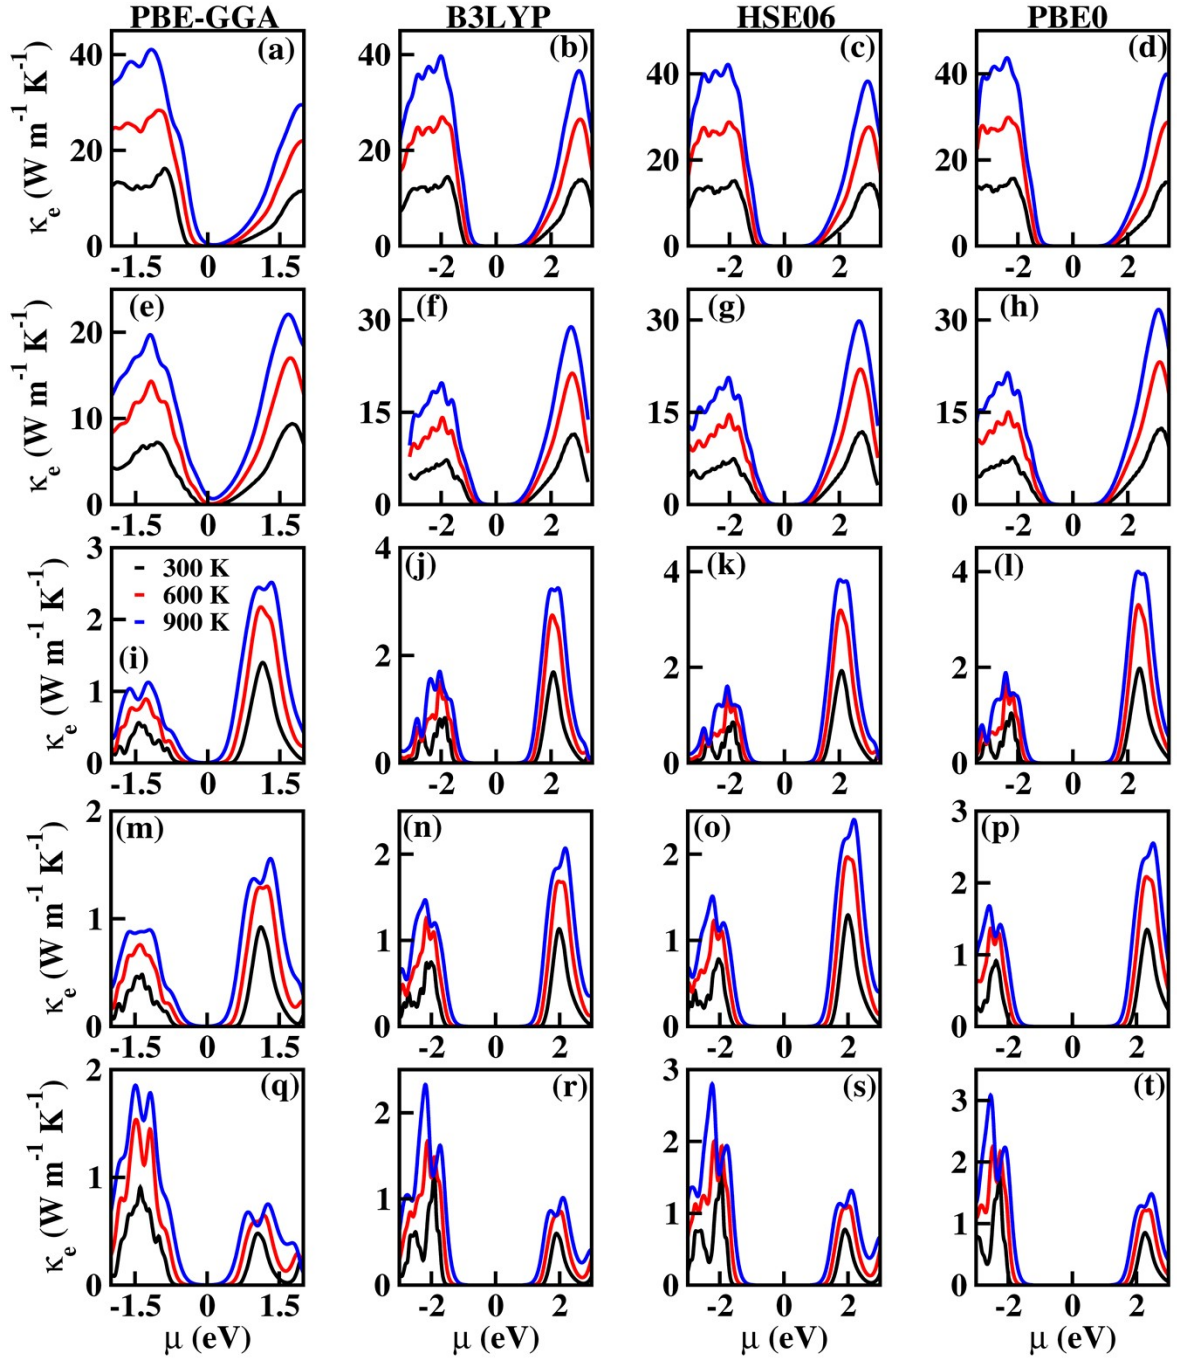

FIG. S3: Calculated electronic contribution to thermal conductivity ( $\kappa_e$ ) for  $X_2\text{PbO}_3$  along x-axis using PBE-GGA, B3LYP, HSE06, and PBE0 functionals: (a-d)  $X=\text{Li}$ , (e-h)  $X=\text{Na}$ , (i-l)  $X=\text{K}$ , (m-p)  $X=\text{Rb}$ , and (q-t)  $X=\text{Cs}$ .



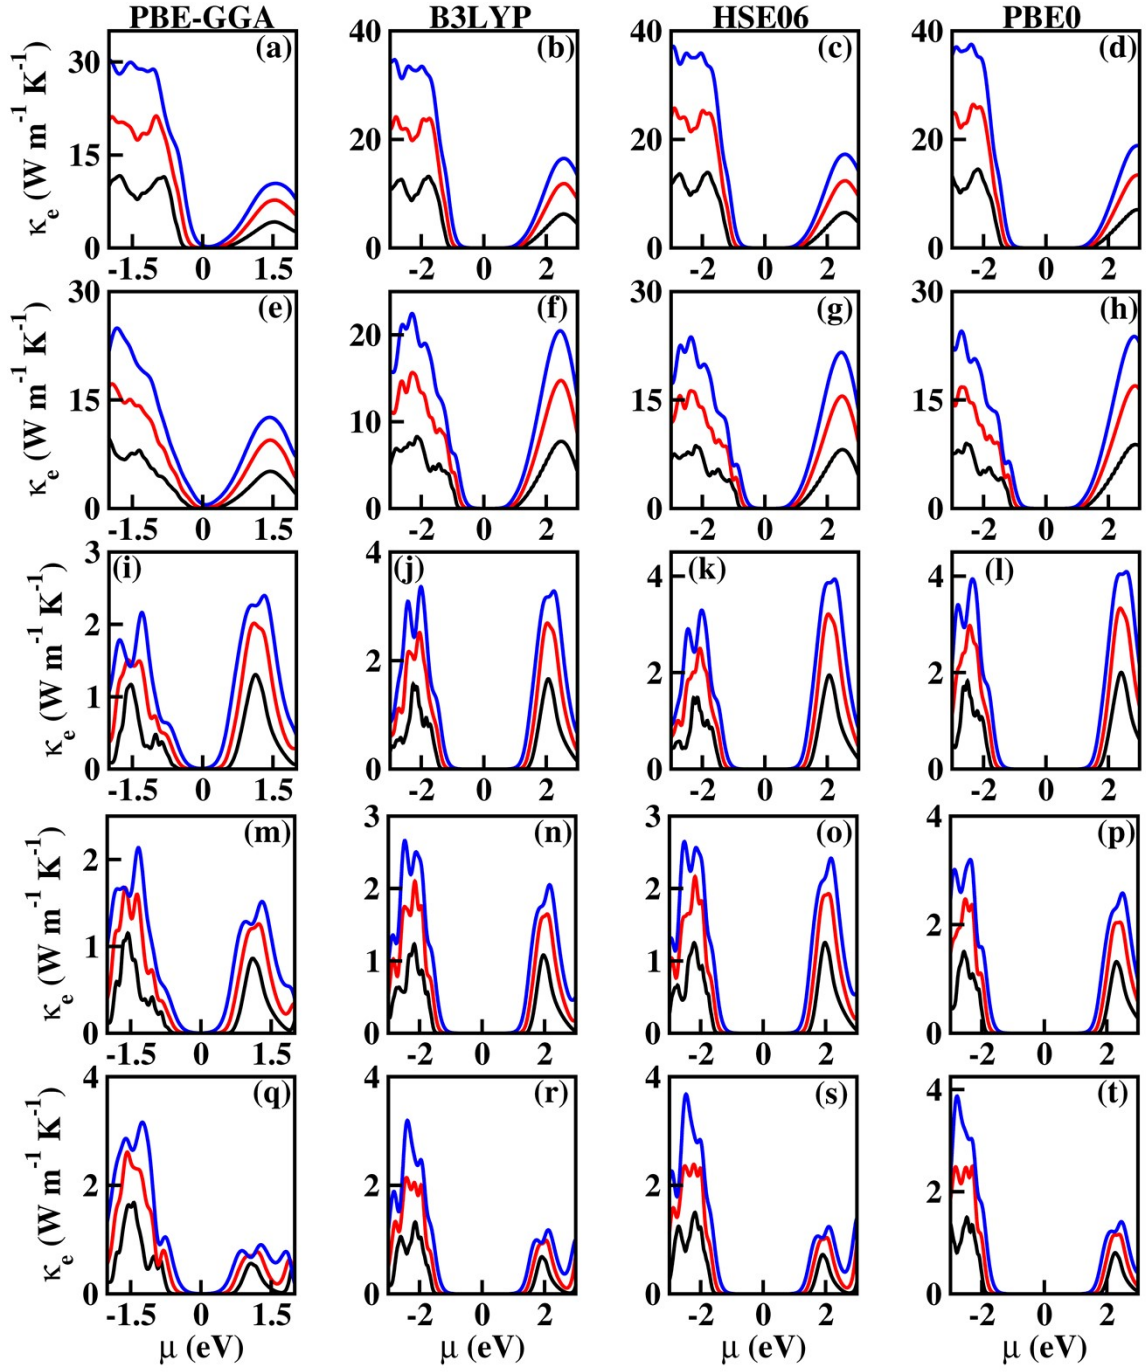

FIG. S4: Calculated electronic contribution to thermal conductivity ( $\kappa_e$ ) for  $X_2\text{PbO}_3$  along y-axis using PBE-GGA, B3LYP, HSE06, and PBE0 functionals: (a-d)  $X=\text{Li}$ , (e-h)  $X=\text{Na}$ , (i-l)  $X=\text{K}$ , (m-p)  $X=\text{Rb}$ , and (q-t)  $X=\text{Cs}$ .

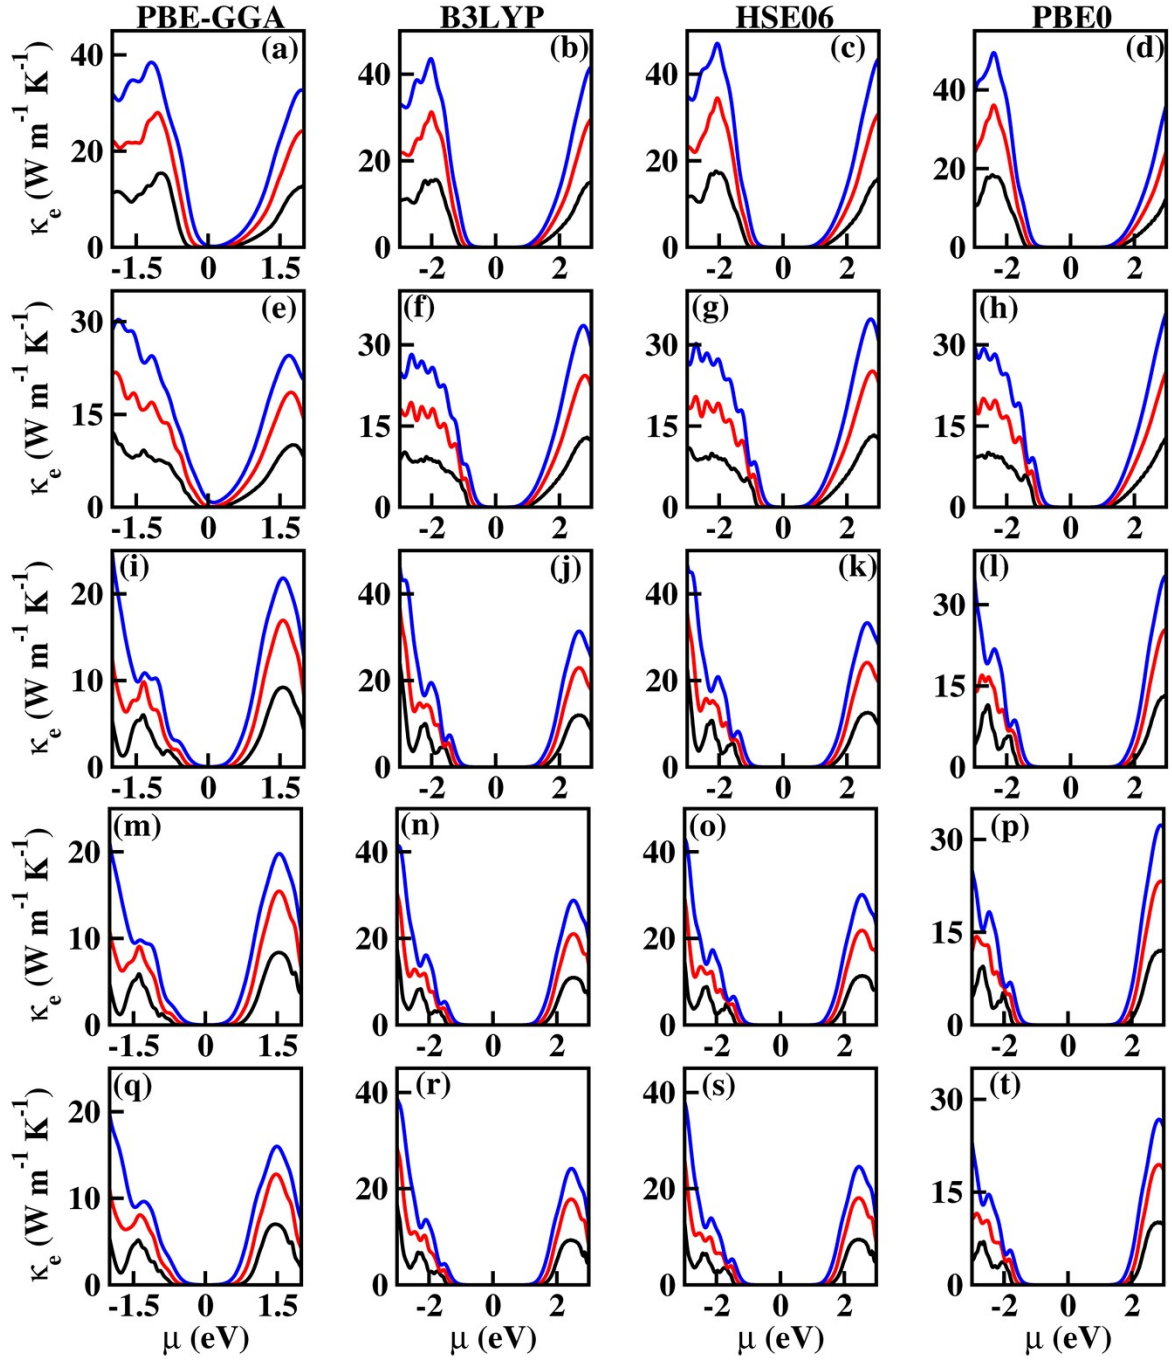

FIG. S5: Calculated electronic contribution to thermal conductivity ( $\kappa_e$ ) for  $X_2\text{PbO}_3$  along z-axis using PBE-GGA, B3LYP, HSE06, and PBE0 functionals: (a-d)  $X=\text{Li}$ , (e-h)  $X=\text{Na}$ , (i-l)  $X=\text{K}$ , (m-p)  $X=\text{Rb}$ , and (q-t)  $X=\text{Cs}$ .

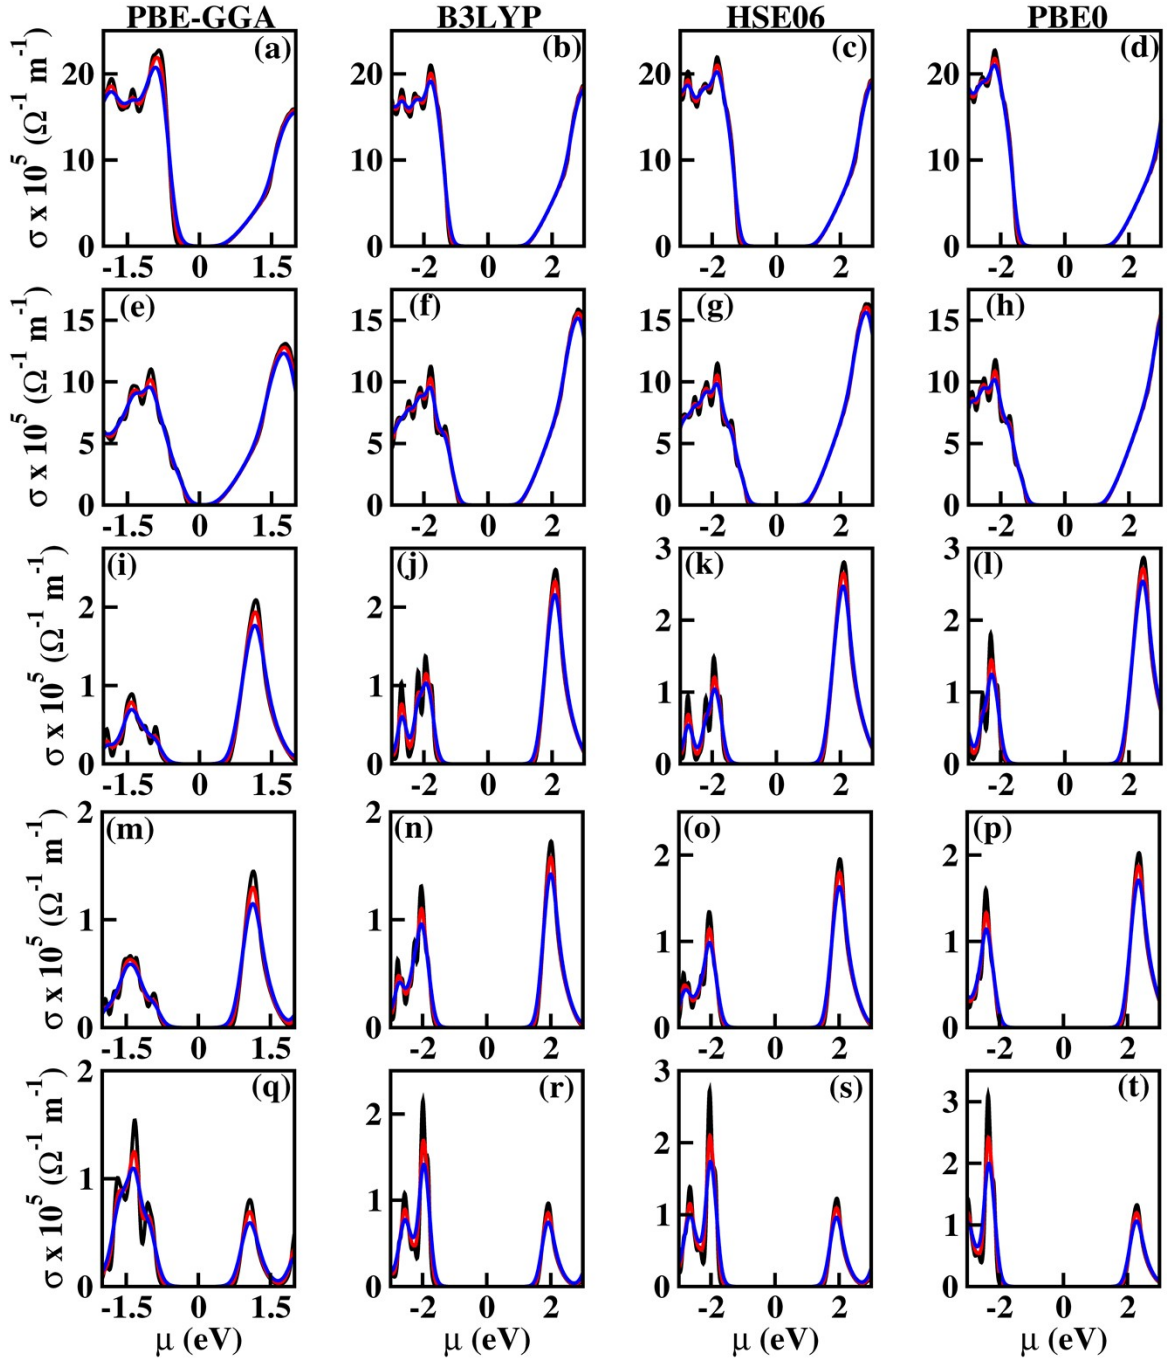

FIG. S6: Calculated electrical conductivity ( $\sigma$ ) for  $X_2\text{PbO}_3$  along x-axis using PBE-GGA, B3LYP, HSE06, and PBE0 functionals: (a-d)  $X=\text{Li}$ , (e-h)  $X=\text{Na}$ , (i-l)  $X=\text{K}$ , (m-p)  $X=\text{Rb}$ , and (q-t)  $X=\text{Cs}$ .



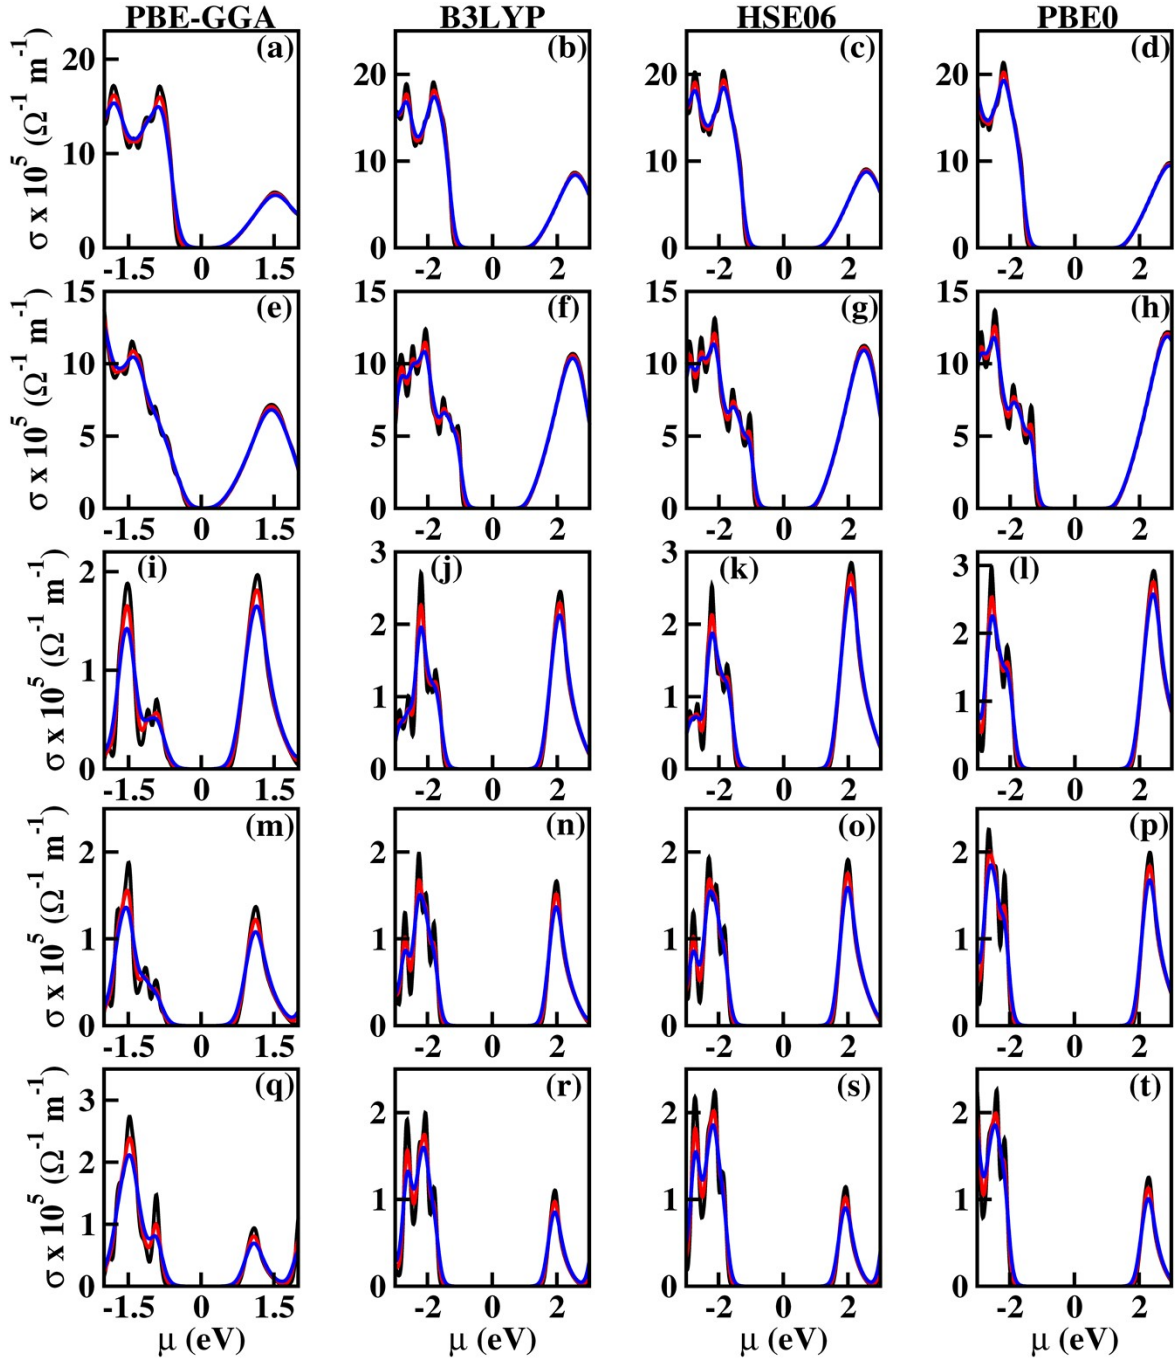

FIG. S7: Calculated electrical conductivity ( $\sigma$ ) for  $X_2PbO_3$  along y-axis using PBE-GGA, B3LYP, HSE06, and PBE0 functionals: (a-d)  $X=Li$ , (e-h)  $X=Na$ , (i-l)  $X=K$ , (m-p)  $X=Rb$ , and (q-t)  $X=Cs$ .

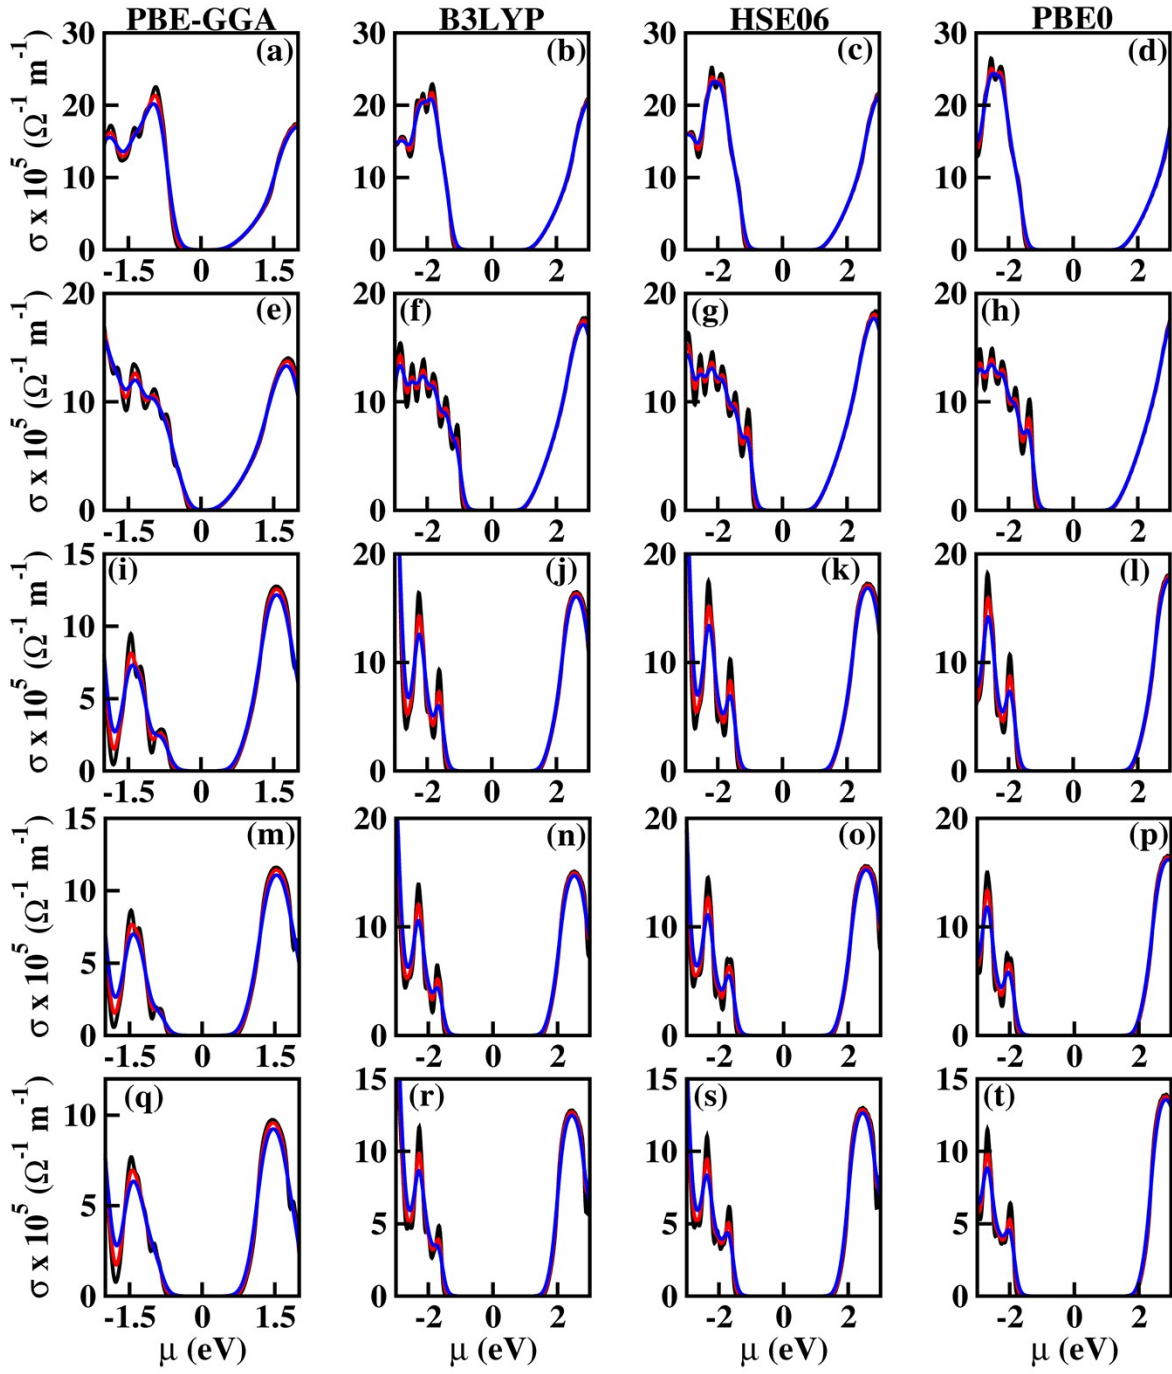

FIG. S8: Calculated electrical conductivity ( $\sigma$ ) for  $X_2\text{PbO}_3$  along z-axis using PBE-GGA, B3LYP, HSE06, and PBE0 functionals: (a-d)  $X=\text{Li}$ , (e-h)  $X=\text{Na}$ , (i-l)  $X=\text{K}$ , (m-p)  $X=\text{Rb}$ , and (q-t)  $X=\text{Cs}$ .

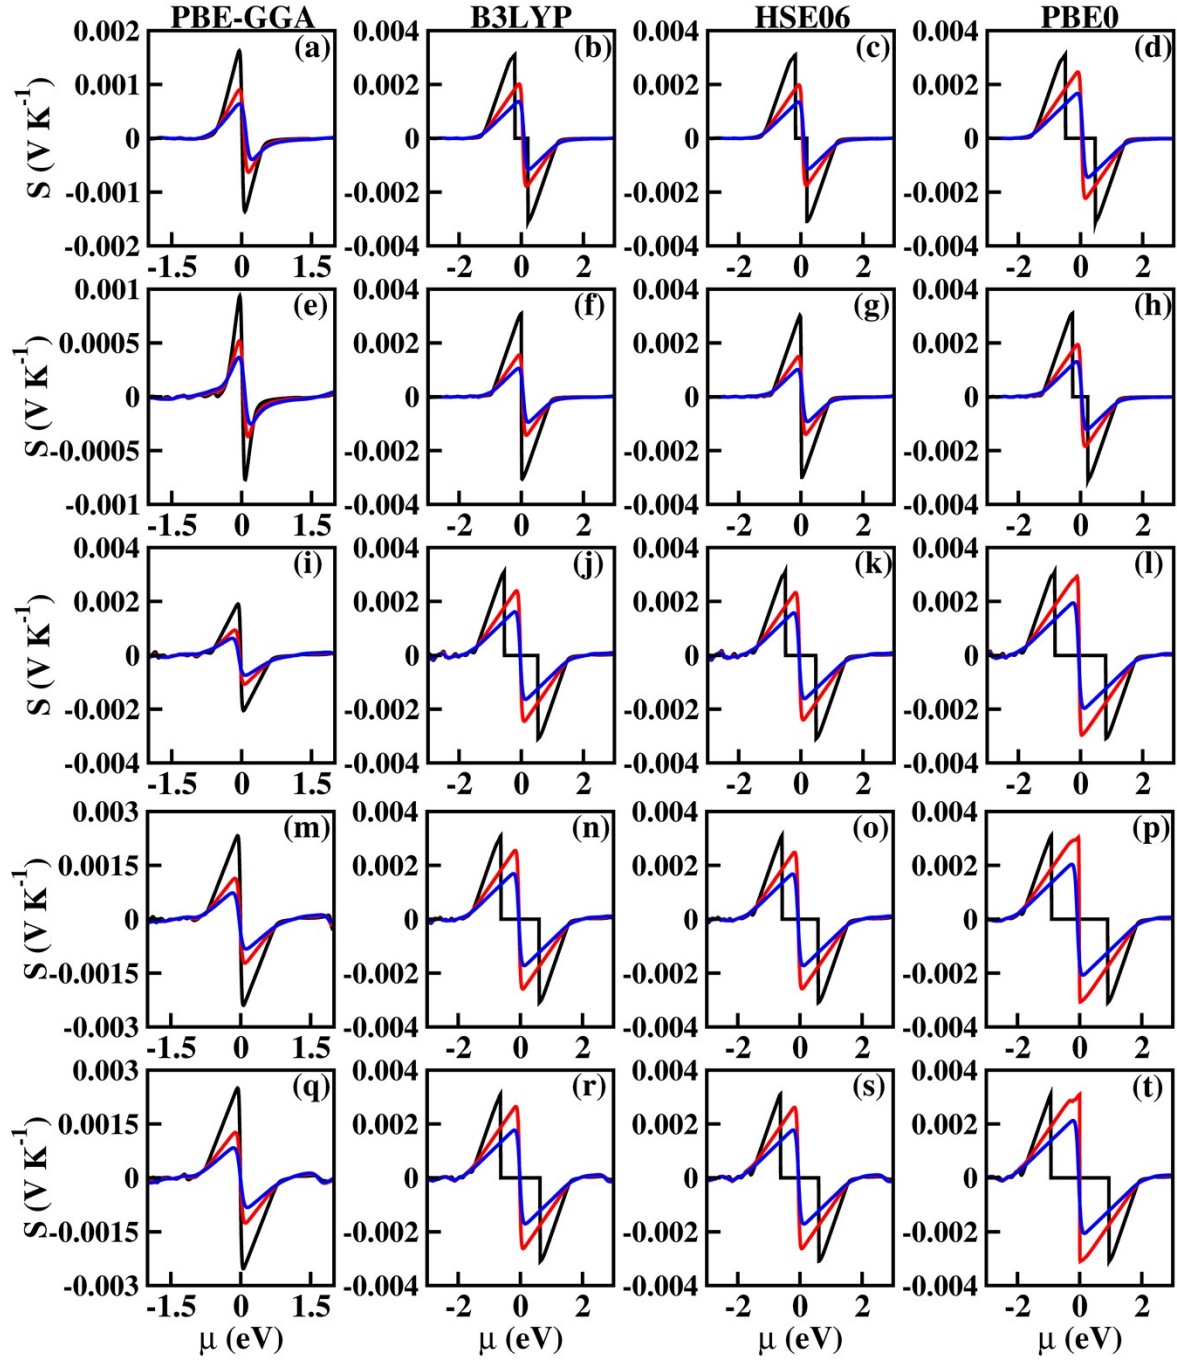

FIG. S9: Calculated Seebeck coefficient ( $S$ ) for  $X_2\text{PbO}_3$  along x-axis using PBE-GGA, B3LYP, HSE06, and PBE0 functionals: (a-d)  $X=\text{Li}$ , (e-h)  $X=\text{Na}$ , (i-l)  $X=\text{K}$ , (m-p)  $X=\text{Rb}$ , and (q-t)  $X=\text{Cs}$ .

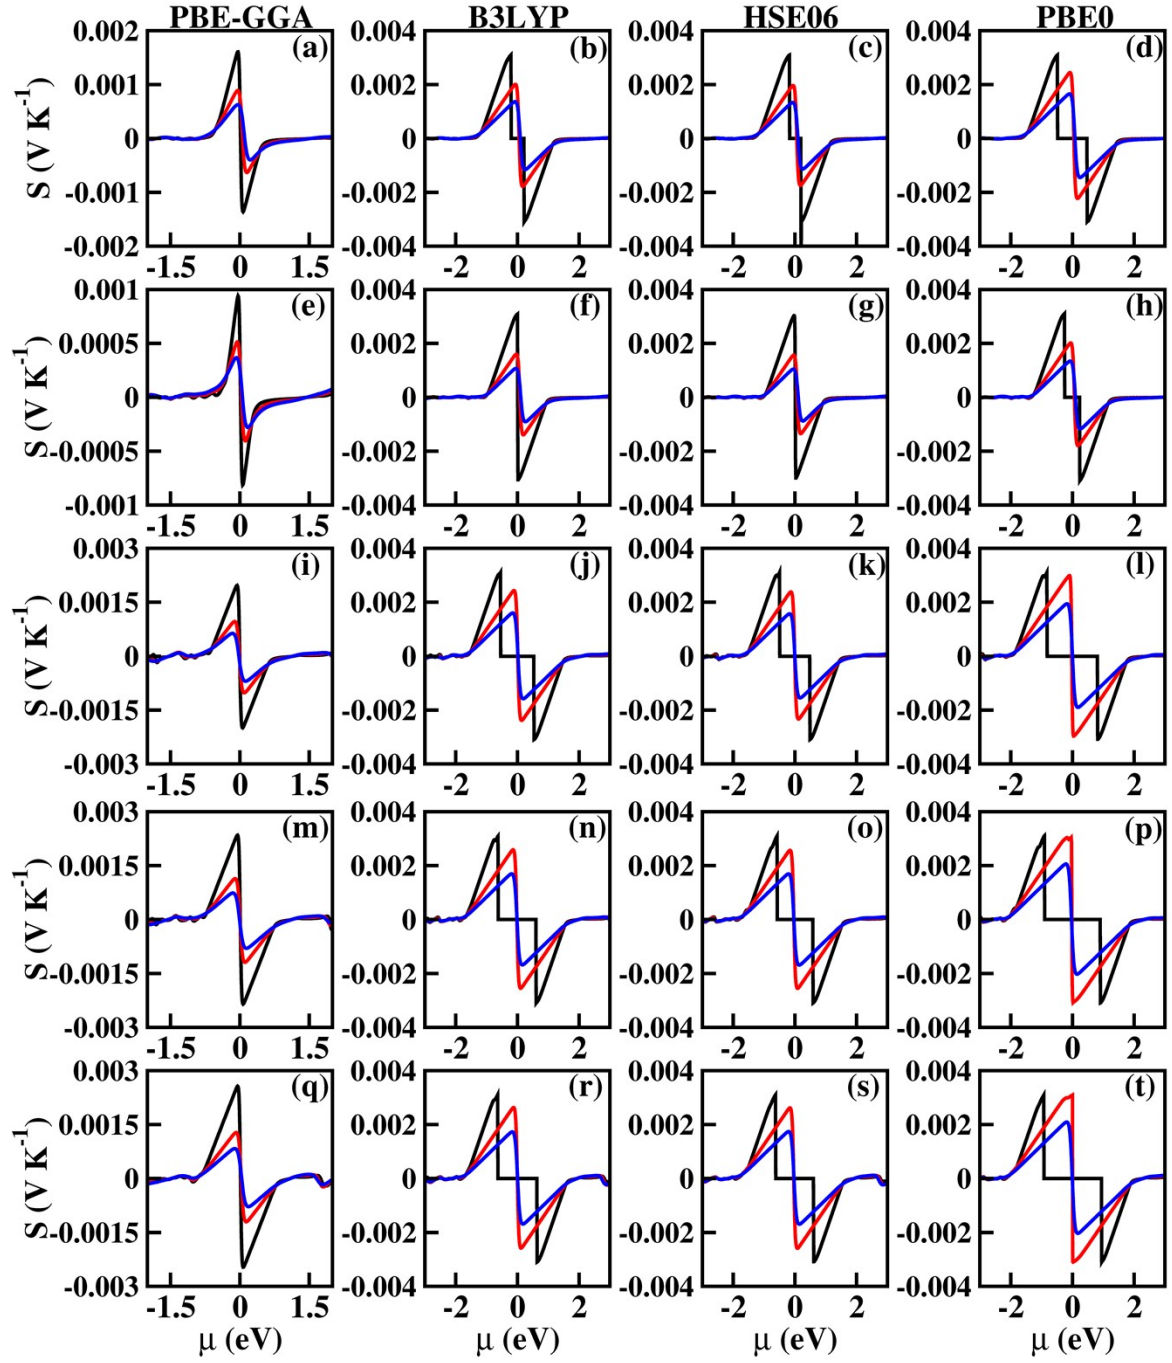

FIG. S10: Calculated Seebeck coefficient ( $S$ ) for  $X_2\text{PbO}_3$  along  $y$ -axis using PBE-GGA, B3LYP, HSE06, and PBE0 functionals: (a-d)  $X=\text{Li}$ , (e-h)  $X=\text{Na}$ , (i-l)  $X=\text{K}$ , (m-p)  $X=\text{Rb}$ , and (q-t)  $X=\text{Cs}$ .



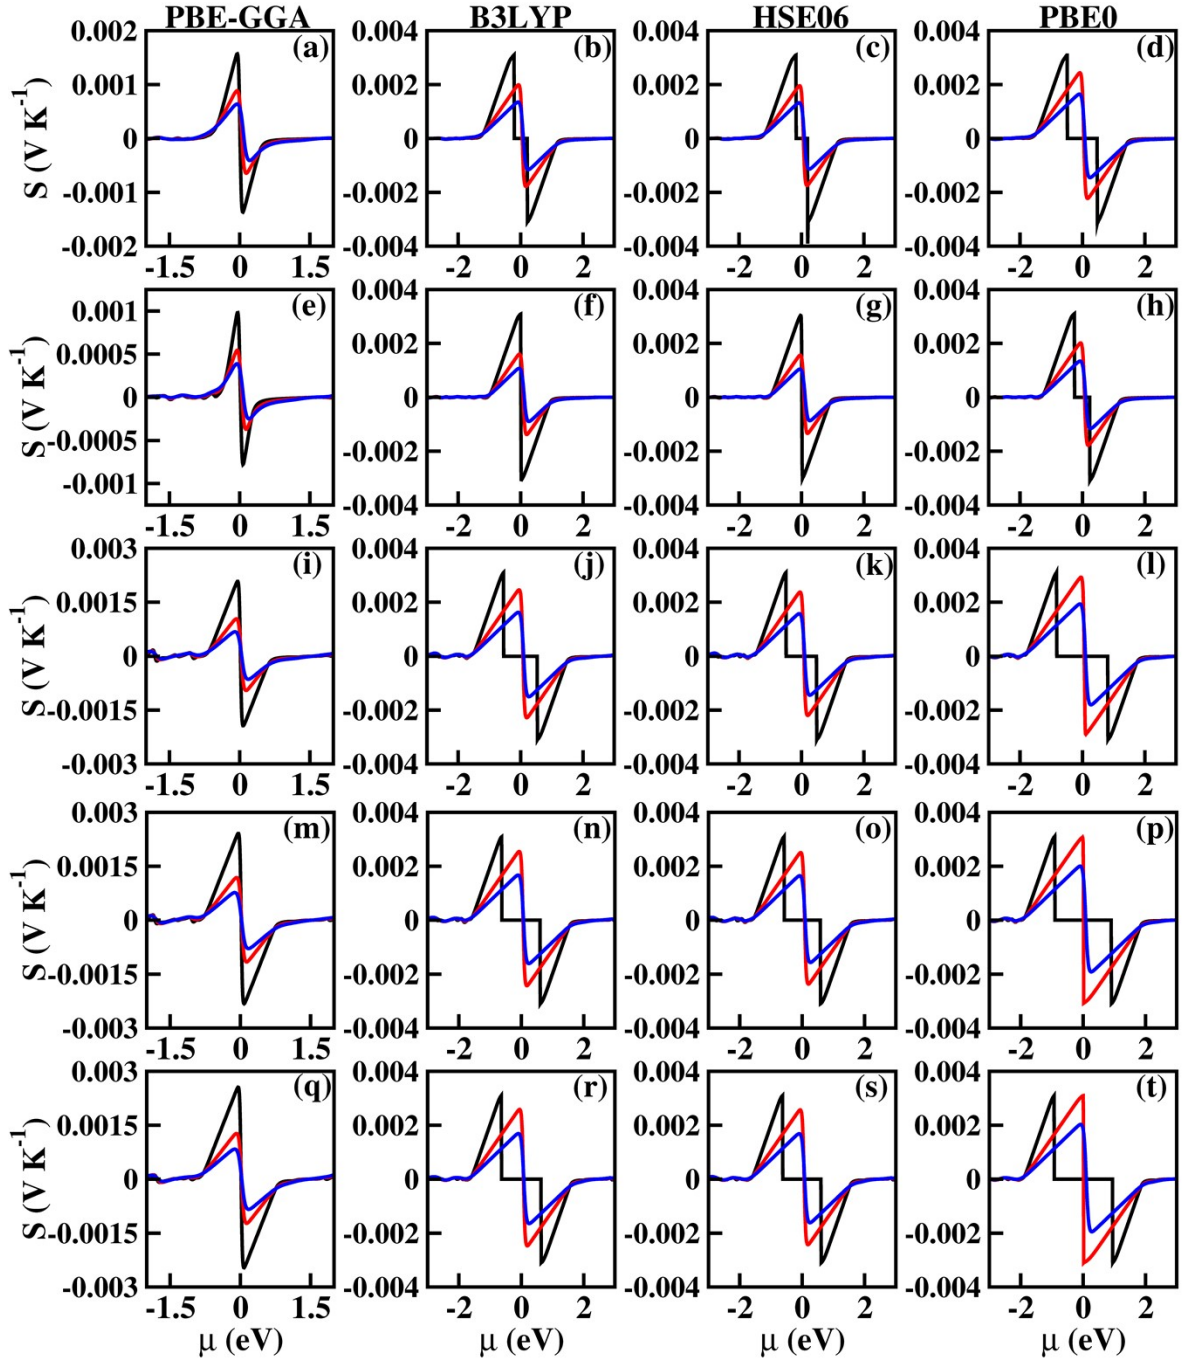

FIG. S11: Calculated Seebeck coefficient ( $S$ ) for  $X_2\text{PbO}_3$  along  $z$ -axis using PBE-GGA, B3LYP, HSE06, and PBE0 functionals: (a-d)  $X=\text{Li}$ , (e-h)  $X=\text{Na}$ , (i-l)  $X=\text{K}$ , (m-p)  $X=\text{Rb}$ , and (q-t)  $X=\text{Cs}$ .



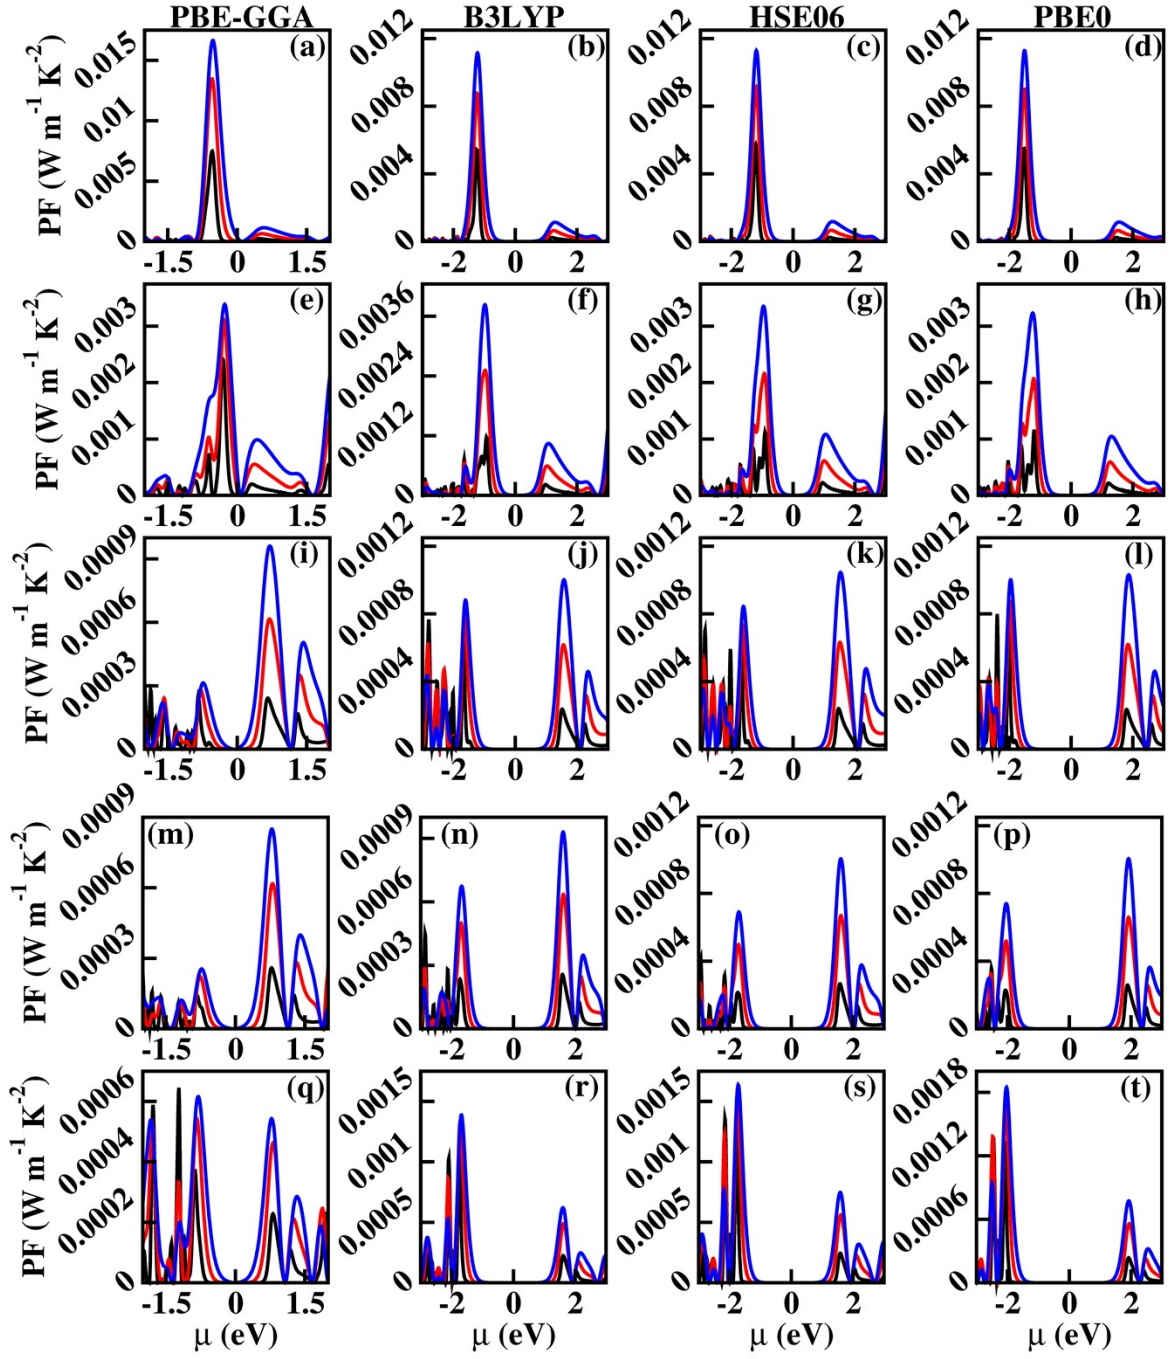

FIG. S12: Calculated power factor (PF) for  $\text{X}_2\text{PbO}_3$  along x-axis using PBE-GGA, B3LYP, HSE06, and PBE0 functionals: (a-d) X=Li, (e-h) X=Na, (i-l) X=K, (m-p) X=Rb, and (q-t) X=Cs.

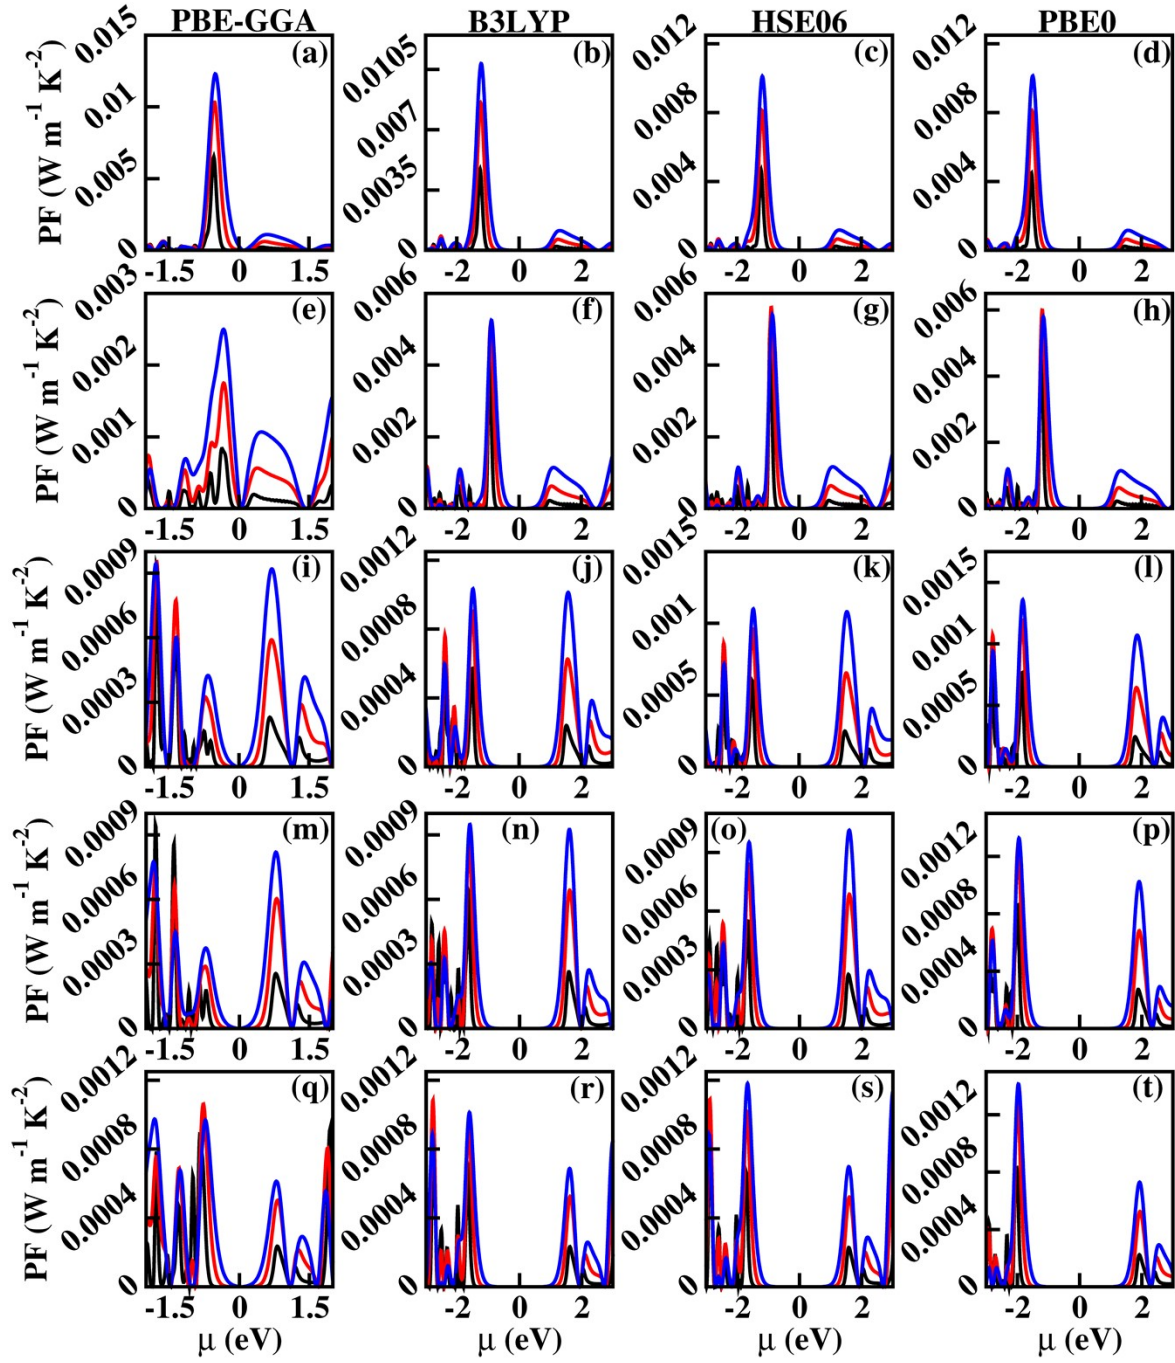

FIG. S13: Calculated power factor (PF) for  $\text{X}_2\text{PbO}_3$  along y-axis using PBE-GGA, B3LYP, HSE06, and PBE0 functionals: (a-d) X=Li, (e-h) X=Na, (i-l) X=K, (m-p) X=Rb, and (q-t) X=Cs.

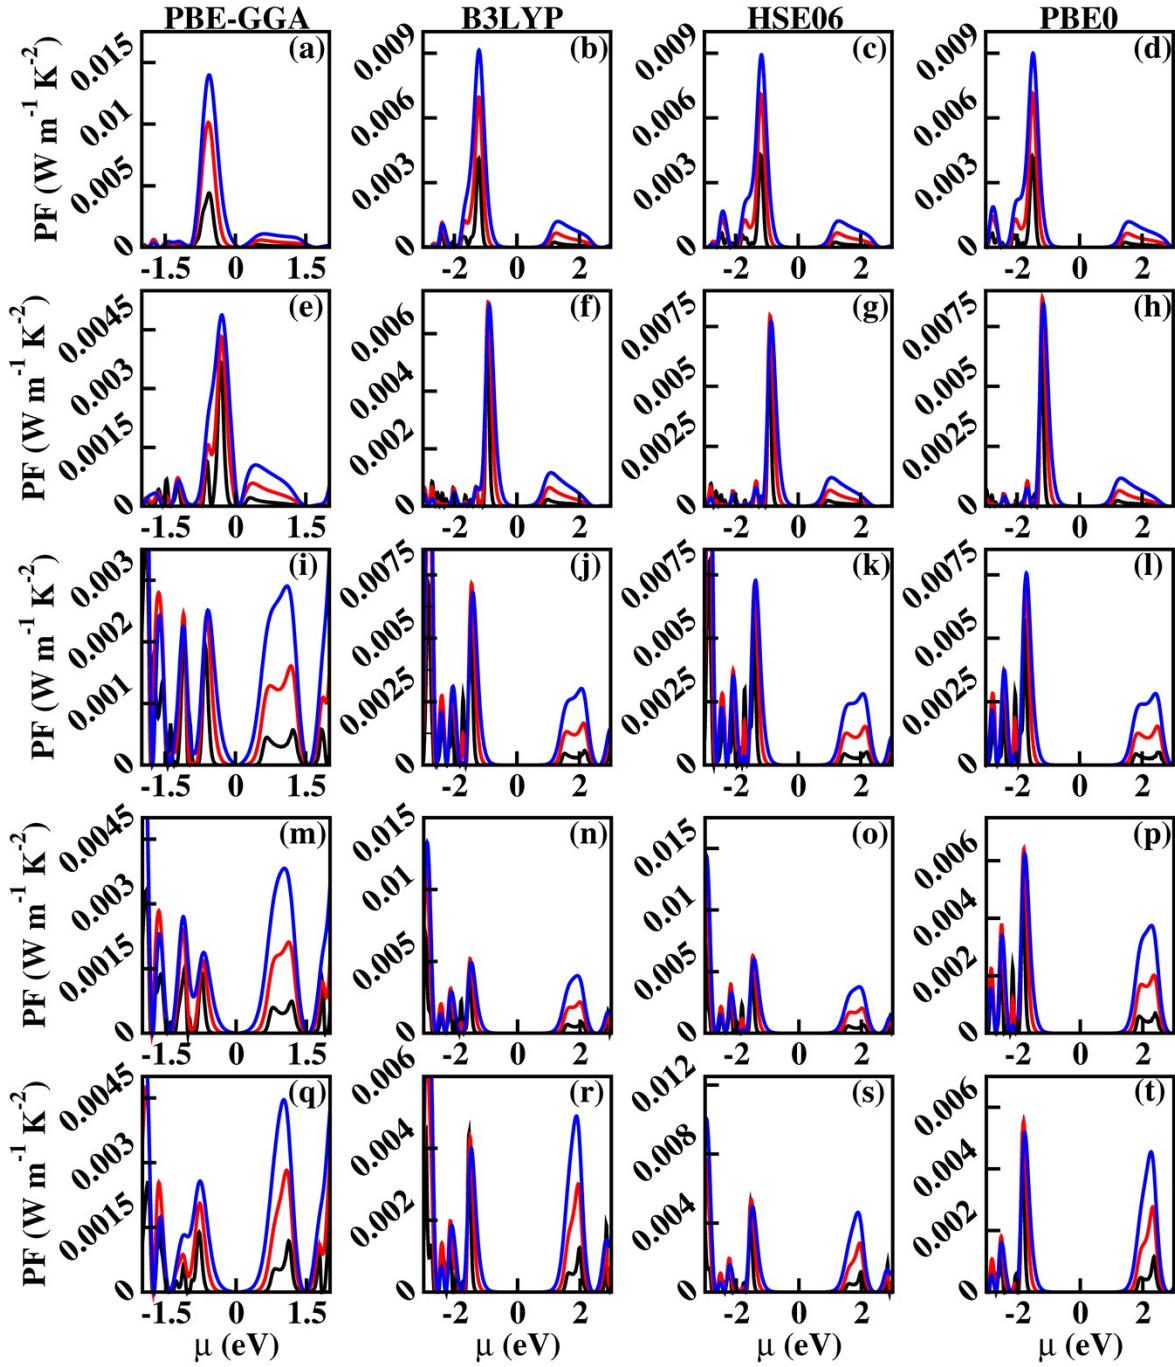

FIG. S14: Calculated power factor (PF) for  $X_2\text{PbO}_3$  along z-axis using PBE-GGA, B3LYP, HSE06, and PBE0 functionals: (a-d)  $X=\text{Li}$ , (e-h)  $X=\text{Na}$ , (i-l)  $X=\text{K}$ , (m-p)  $X=\text{Rb}$ , and (q-t)  $X=\text{Cs}$ .



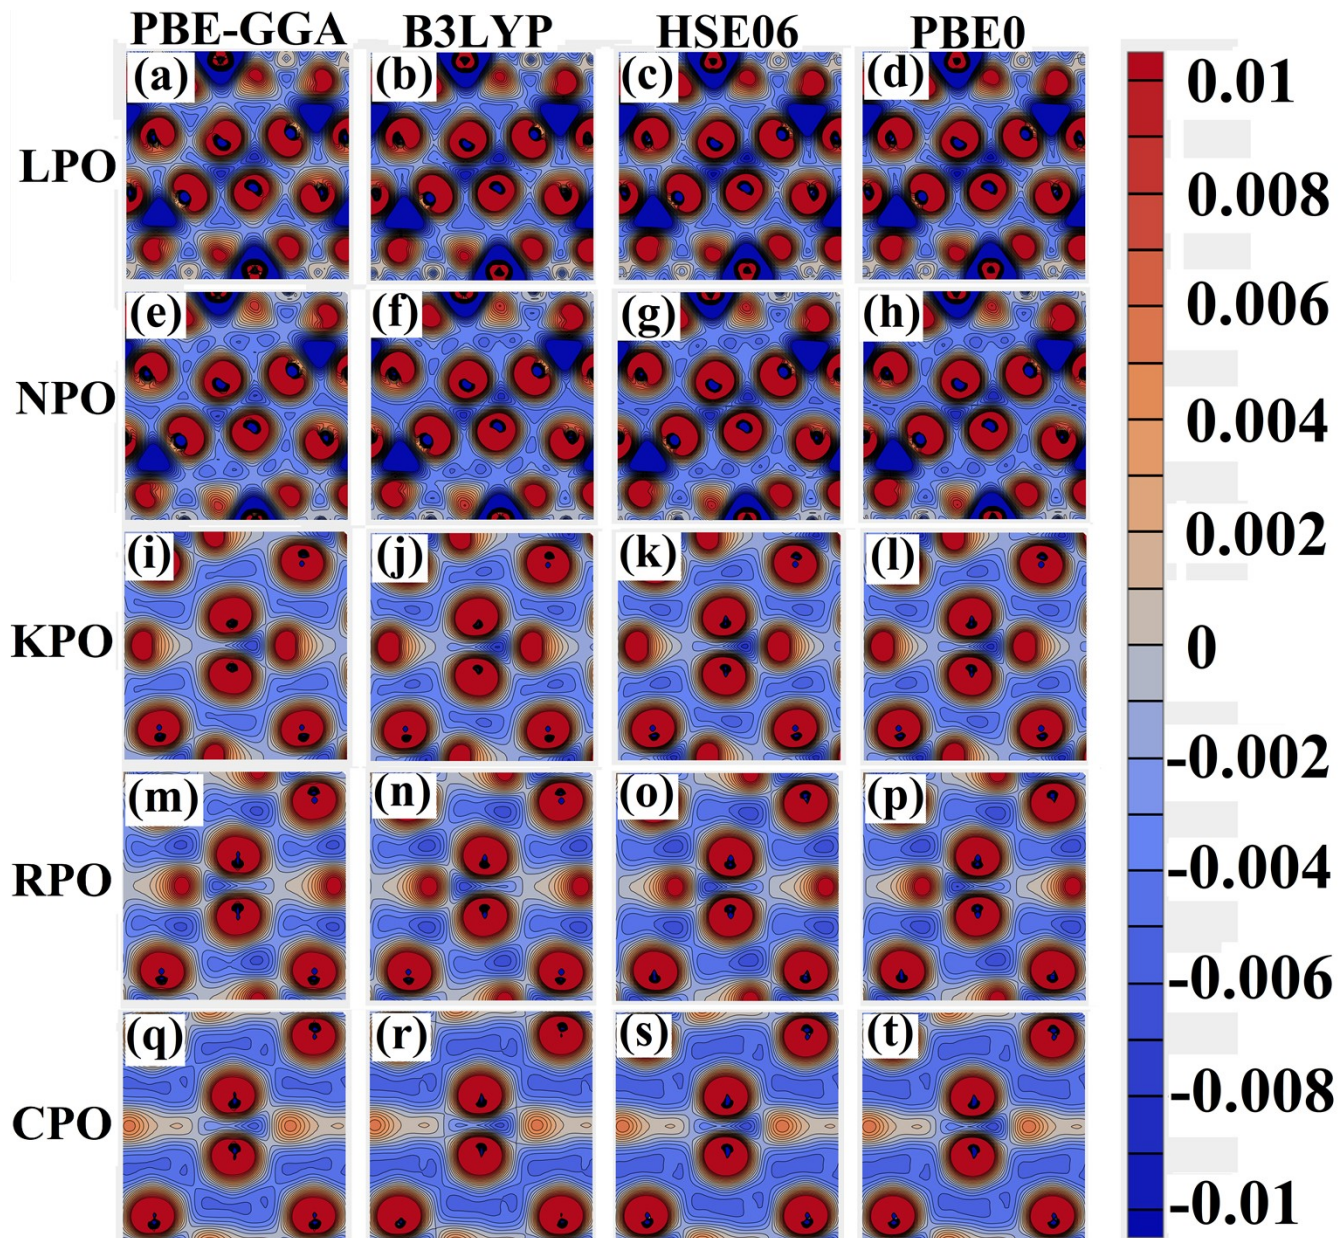

FIG. S15: Calculated difference map of electron charge densities for  $X_2PbO_3$  using PBE-GGA, B3LYP, HSE06, and PBE0 functionals: (a-d)  $X=Li$ , (e-h)  $X=Na$ , (i-l)  $X=K$ , (m-p)  $X=Rb$ , and (q-t)  $X=Cs$ . Here, a larger red circular region with high density represent O-atom, a smaller red region is Pb-atom and very faint or empty region located in the interstitial site is X-atom.

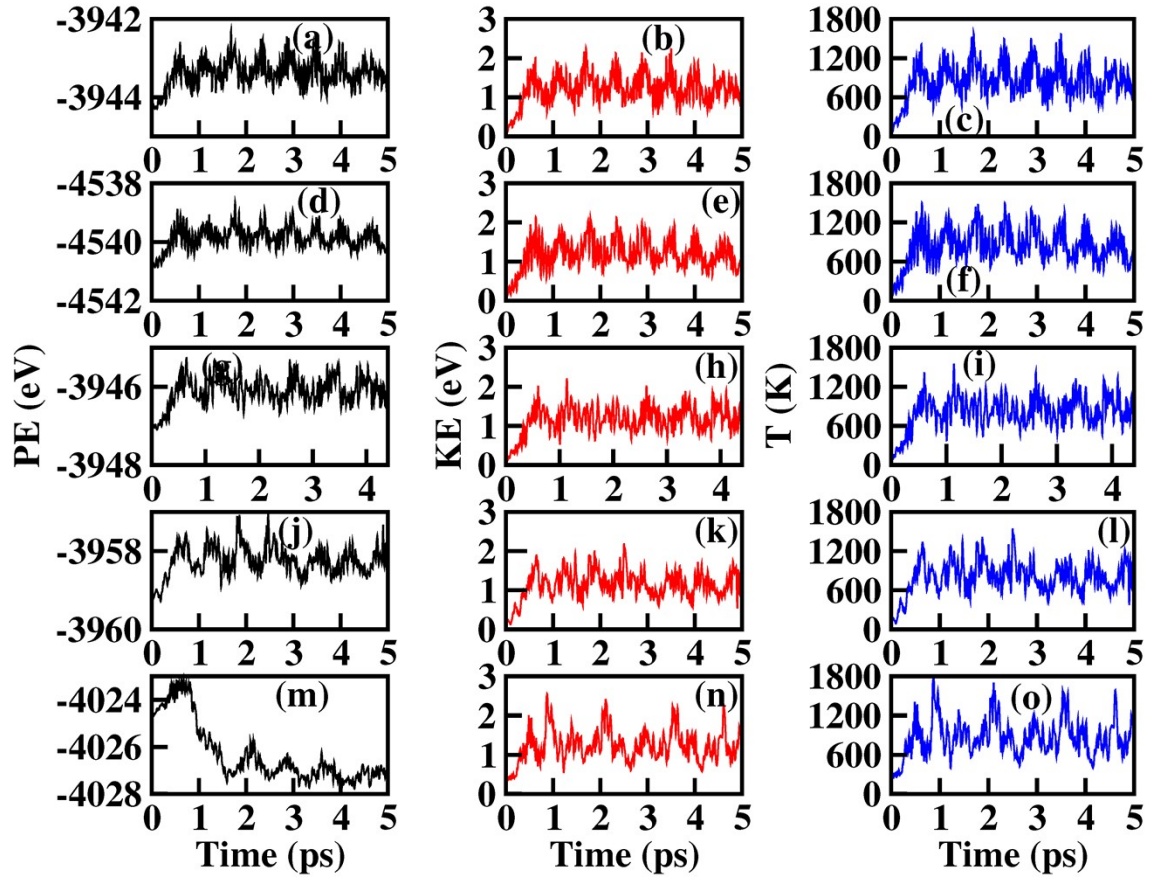

FIG. S16: The potential energy (PE), kinetic energy (KE), and evolution of temperature (T) as a function of time steps calculated using MD-simulation based on nVT-canonical ensemble at  $T = 850$  K: (a-c)  $X=\text{Li}$ , (d-f)  $X=\text{Na}$ , (g-i)  $X=\text{K}$ , (j-l)  $X=\text{Rb}$ , and (m-o)  $X=\text{Cs}$ .

## Oxygen Vacancy in $Cmc2_1\text{-Li}_2\text{PbO}_3$ and $C2/c\text{-X}_2\text{PbO}_3$ :

Table S2: Calculated structural parameters for  $Cmc2_1\text{-Li}_2\text{PbO}_3$  and  $C2/c\text{-X}_2\text{PbO}_3$  under oxygen vacancy and electronic band gap.

| Compound                  | a (Å) | b (Å) | c (Å) | $\alpha$ | $\beta$ | $\gamma$ | $E_g$ (eV) |
|---------------------------|-------|-------|-------|----------|---------|----------|------------|
| $\text{Li}_2\text{PbO}_3$ | 5.65  | 9.25  | 5.70  | 90.00    | 111.03  | 90.00    | 0.86       |
| $\text{K}_2\text{PbO}_3$  | 10.88 | 7.33  | 6.14  | 90.00    | 90.00   | 90.00    | 0.75       |

In the case of  $\text{Li}_2\text{PbO}_3$ , the creation of an oxygen vacancy leads to a distinct anisotropic lattice response, wherein the lattice constants  $a$  and  $c$  exhibit an expansion, while the  $b$  parameter undergoes a contraction. Conversely, for  $\text{K}_2\text{PbO}_3$ , the introduction of an oxygen vacancy results in a reduction of the  $a$  lattice constant, accompanied by an increase in both  $b$  and  $c$ . These structural distortions can be attributed to the redistribution of local bonding environments and relaxation effects around the vacancy site. In addition to the lattice modifications, the formation of oxygen vacancies induces a noticeable reduction in the electronic band gap ( $E_g$ ) of both compounds, reflecting the creation of defect states



and enhanced electronic delocalization. This band gap narrowing suggests that vacancy engineering could significantly influence the electronic and functional properties of  $X_2\text{PbO}_3$  systems.

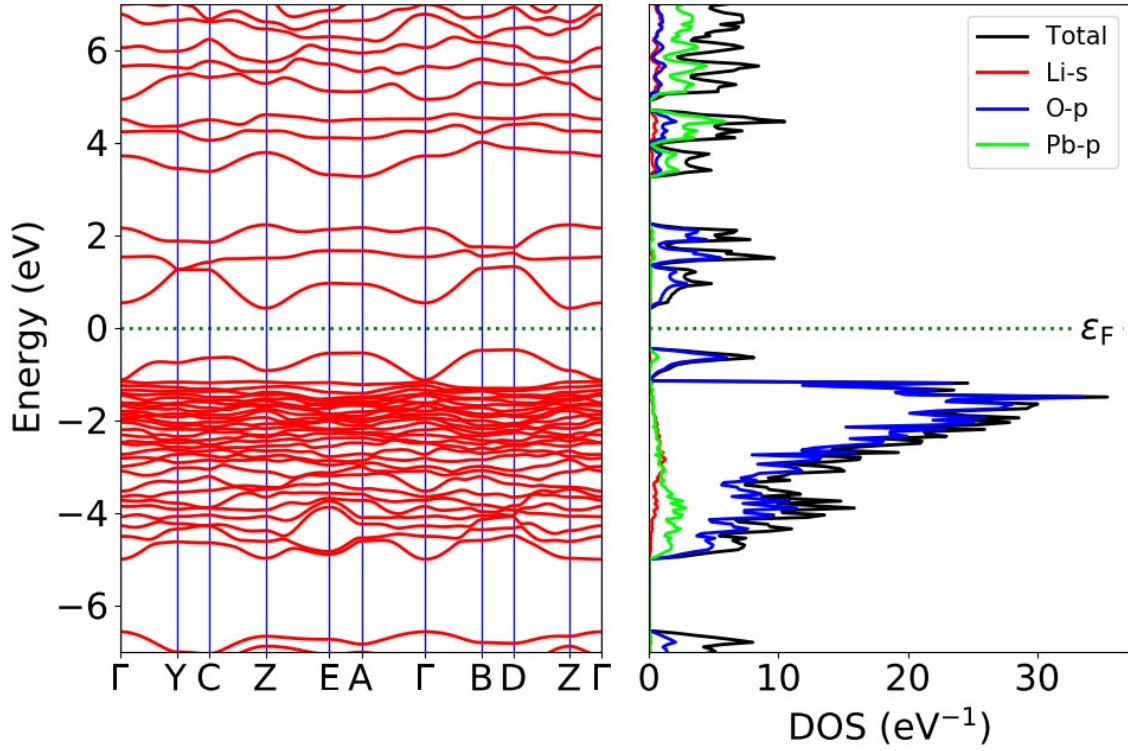

FIG. S17: Band structure and DOS for  $\text{Li}_2\text{PbO}_3$  with oxygen vacancy calculated using GGA approximation.

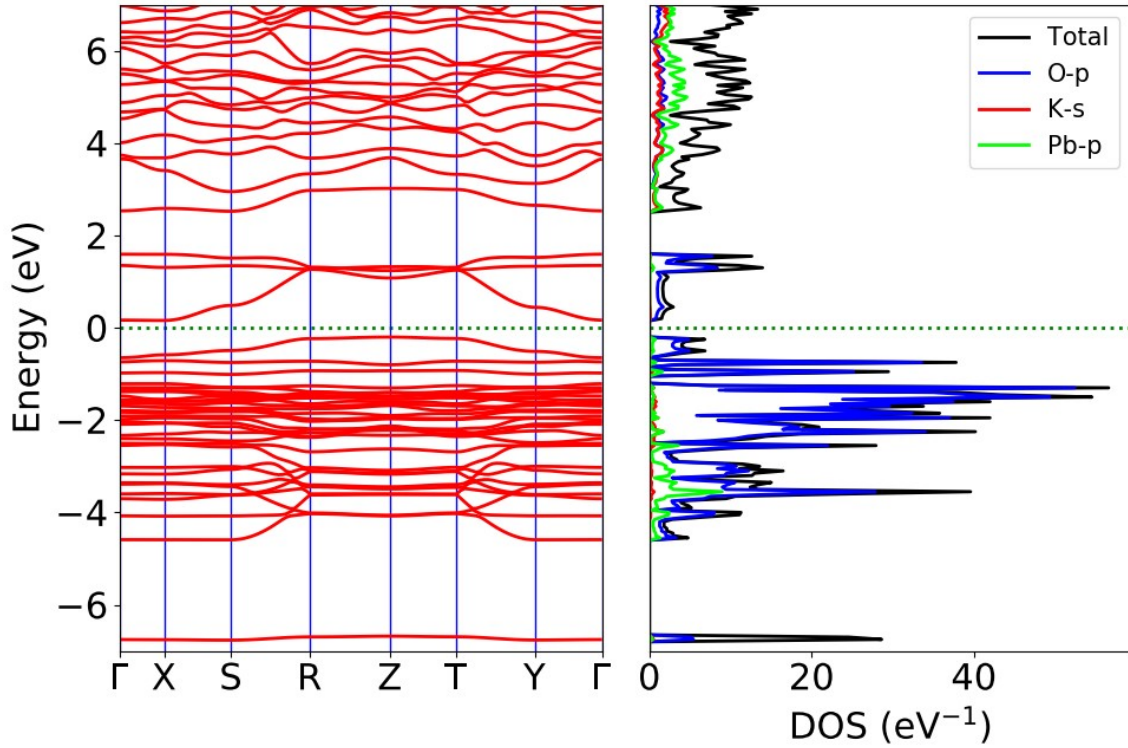

FIG. S18: Band structure and DOS for  $\text{K}_2\text{PbO}_3$  with oxygen vacancy calculated using GGA approximation.

## References:

- [1] B. Brazel and R. Hoppe, Über Oxoplumbate(IV): Die Kristallstruktur von  $\text{TT-Li}_2\text{PbO}_3$  [1], Zeitschrift für Naturforschung - Section B Journal of Chemical Sciences 37, 1369 (1982).
- [2] R. Hoppe, H.-J. Rhrborn, and H. Walker, Neue Plumbate und Stannate der Alkalimetalle, Die Naturwissenschaften 51, 86 (1964).
- [3] R. Hoppe and H. Stöver, Zur Kristallstruktur von  $\text{Rb}_2\text{PbO}_3$ , Zeitschrift für anorganische und allgemeine Chemie 437, 123 (1977).
- [4] P. Panek and R. Hoppe, Zur Kristallstruktur von  $\text{Cs}_2\text{PbO}_3$ , Zeitschrift für anorganische und allgemeine Chemie 393, 13 (1972).
